# Supplementary material for: Ayurvedic Treatment of Acute Ischemic Stroke: A Prospective Observational Study
Source: PubMed Central journal article supplement — Glob Adv Health Med. 2019 May 30;8:2164956119849396. doi: 10.1177/2164956119849396 (PMC6545648; doi:10.1177/2164956119849396), 2019-05-30

Supplemental Figure 1: Flowchart of the Ayurvedic treatment protocol.

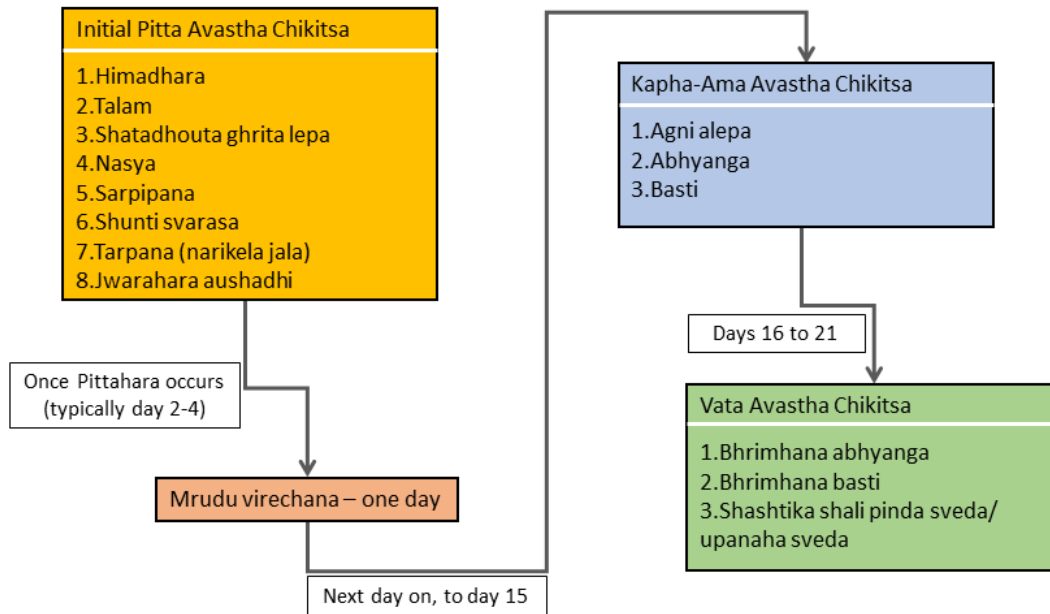

Supplemental Figure 2: Comparison of blood pressure profiles in the two cohorts. Dotted red lines: Ayurvedic cohort; Continuous blue lines: Western medicine cohort.  
*Note:* x-axis not drawn to scale.

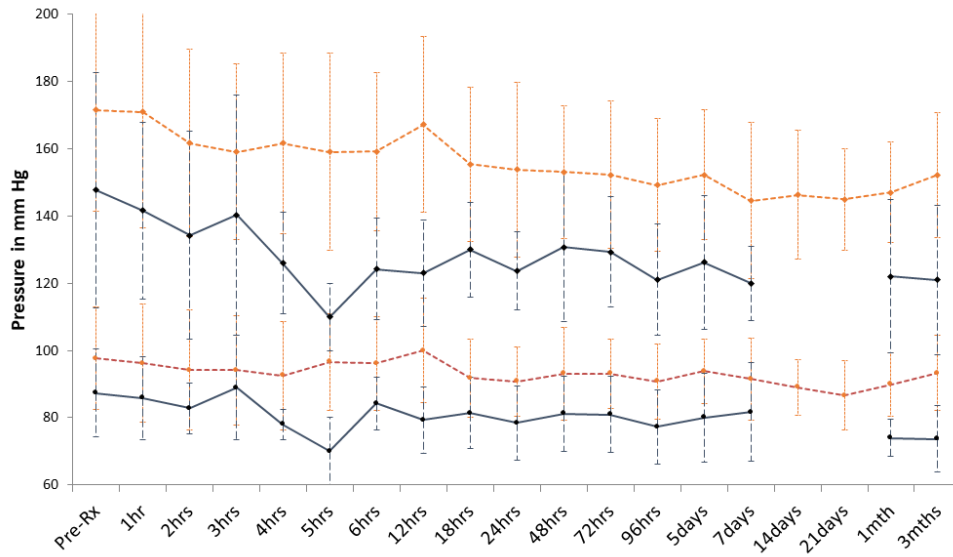

Supplement: Supplemental_Material.pdf [file Supplemental_Material.pdf]
